# Supplementary material for: Improved human visuomotor performance and pupil constriction after choline supplementation in a placebo-controlled double-blind study
Source: PubMed Central journal article supplement (PMC4536529; doi:10.1038/srep13188), 2015-08-14
Supplement: srep13188-s1.pdf [file srep13188-s1.pdf]

1 **Supplementary Information**

2 **Title:** Improved human visuomotor performance and pupil constriction after choline

3 supplementation in a placebo-controlled double-blind study

4 **Authors:** Marnix Naber, Bernhard Hommel, & Lorenza S. Colzato

5

| Assessment | <i>n</i> | Behavioral Variable  | Correlation Coefficient | Confidence Intervals     | <i>p</i> -value | FDR corrected <i>p</i> |
|------------|----------|----------------------|-------------------------|--------------------------|-----------------|------------------------|
| 2 (20min)  | 26       | Hit Distance         | 0.105                   | -0.2406 – 0.4708         | 0.6085          | 0.6426                 |
|            |          | Reaction Time        | 0.237                   | -0.0125 – 0.5100         | 0.2507          | 0.6426                 |
|            |          | Misses               | -0.096                  | -0.3964 – 0.2010         | 0.6426          | 0.6426                 |
| 3 (40min)  | 26       | <b>Hit Distance</b>  | <b>0.425</b>            | <b>0.0286 – 0.7490</b>   | <b>0.0306</b>   | <b>0.0374</b>          |
|            |          | <b>Reaction Time</b> | <b>0.464</b>            | <b>0.2121 – 0.6893</b>   | <b>0.0170</b>   | <b>0.0374</b>          |
|            |          | <b>Misses</b>        | <b>-0.410</b>           | <b>-0.7126 – -0.1057</b> | <b>0.0374</b>   | <b>0.0374</b>          |
| 4 (60min)  | 26       | Hit Distance         | 0.207                   | -0.1246 – 0.5507         | 0.3102          | 0.3102                 |
|            |          | Reaction Time        | 0.314                   | 0.0653 – 0.5531          | 0.1189          | 0.3102                 |
|            |          | Misses               | -0.225                  | -0.5160 – 0.0954         | 0.2690          | 0.3102                 |
| 5 (90min)  | 24       | <b>Hit Distance</b>  | <b>0.465</b>            | <b>0.1148 – 0.8636</b>   | <b>0.0221</b>   | <b>0.0221</b>          |
|            |          | <b>Reaction Time</b> | <b>0.579</b>            | <b>0.3578 – 0.8426</b>   | <b>0.0030</b>   | <b>0.0046</b>          |
|            |          | <b>Misses</b>        | <b>-0.623</b>           | <b>-0.9244 – -0.2804</b> | <b>0.0011</b>   | <b>0.0034</b>          |
| 6 (120min) | 23       | Hit Distance         | 0.312                   | -0.0660 – 0.7595         | 0.1480          | 0.1480                 |
|            |          | <i>Reaction Time</i> | <i>0.445</i>            | <i>0.1614 – 0.7777</i>   | <i>0.0335</i>   | <i>0.0502</i>          |
|            |          | <b>Misses</b>        | <b>-0.528</b>           | <b>-0.8608 – -0.1434</b> | <b>0.0096</b>   | <b>0.0288</b>          |

6

7 **Supplementary Table S1. Statistical details of correlations between changes in pupil size and**

8 **visuomotor performance variables.** Statistics of correlation coefficients between changes in pupil size

9 (assessment 2-5) compared to baseline (assessment 1) and each behavioral variable from the visuomotor

10 aiming task. Confidence intervals were computed with a bootstrap procedure with replacement. FDR

11 means false-discovery-rate and significant correlations are printed in bold (or italic when FDR corrected

12 was not significant). Correlation coefficients are also shown in Figure 2d.
